# Supplementary material for: PubMatcher: a web app to streamline genomic data interpretation with automated bibliographic research
Source: Research Square preprint supplement (doi:10.21203/rs.3.rs-7224867/v1), 2025-07-29
Supplement: Supplementary file 1 [file 5a57b19e6ded4d9ca5cd080f.xlsx]

## Sheet: Feuil1
Table S1: Example Set of Filters for Selecting Genetic Variants of Interest in Whole Genome Sequencing
Criteria	Known P/LP§	pLof	De Novo Coding	Homozygous	Compound Heterozygous	Splicing
				Coding
Genotype	Proband‡	Proband‡	Proband‡	Proband Homozygous	Proband	Proband
			Absent from Parents
Minimal Impact	NA	High	Moderate	Moderate	Moderate	NA
(Variant effect predictor)
Population Frequency (GnomAD)	0.01	0.001	0.01	0.01	0.01	0.1%
Database and Score	ClinVar	NA	NA	NA	NA	At least one SpliceAI Score >0,5
	P/LP§
Minimal variant occurrence within gene	1	1	1	1	2	1
§ Pathogenic / Likely Pathogenic ‡ Heterozygous or Homozygous NA= Not Applied
The coverage requirement for all filters is 4 reads per position with at least 2 observations of the alternate allele. The maximum frequency in the internal cohort is 1% for all selected variants to eliminate potential recurrent artifacts. Genotype criteria filters variant based on carying individuals in trio for each variant. Impact criteria filter potential effect on protein : High impact varia…
