# Supplementary material for: PubMatcher: a web app to streamline genomic data interpretation with automated bibliographic research
Source: Research Square preprint supplement (doi:10.21203/rs.3.rs-7224867/v1), 2025-07-29
Supplement: Supplementary file 2 [file dc3f133f6c4407171248a888.xlsx]

## Sheet: Feuil1
Table 1: Miss- or non-annotated genes in OMIM with relevant variants for 100 WGS analyses
These examples were all retrieved via PubMatcher and were selected based on their clinical relevance, novelty, and the lack of sufficient annotation in OMIM for the associated phenotype.
Disease	Gene	Variant(s)	Conclusion in final report	Comment
Ectodermal dysplasia	LEF1	Heterozygous (LoF) inherited from affected mother	Pathogenic variant	OMIM morbid gene referenced in “sebaceous tumor” without reference to genodermatosis.
		NM_016269.5:c.856del; p.(His286MetfsTer18)13
				Two published cohorts associate LEF1 and ectodermal dysplasia14,15
End-stage renal failure, facial dysmorphism, early-onset diabetes, cardiomyopathy, hepatic malformations *	PDIA6	Homozygous deletion of exons 3 and 4 (NM_005742.4)	Pathogenic variant	Non OMIM morbid gene
		Predicted truncation without Non sense mediated decay
				Compatible syndromic forms described16,17
Undetermined nephropathy	ROBO1	Compound Heterozygous (NM_002941.4)	Variants of unknown significance	OMIM morbid gene for neuro-oculorenal syndromic without reference to an isolated renal form.
(renal agenesis, End-Stage Kidney Disease)		c.4385A>G; p.(Lys1462Arg)
				Isolated CAKUT described 18
		c.2799G>A ; p.(Ala933=) (SpliceAI_DG=0,81)
Undetermined nephropathy	DACT1	Heterozygous (missense) inherited from unaffected mother	Variant of unknown significance	OMIM morbid gene for the Townes-Brocks syndrome without reference to an isolated renal form.
		NM_001079520.2:c.1660C>T; p.(Leu554Phe)
				Isolated CAKUT described with mild penetrance 19
Mild intellectual disability, speech delay, and autism spectrum disorder	PTPRD	Heterozygous (canonical splice site) inherited from affected father	Not in final report	Non OMIM morbid gene
		NM_002839.4:c.5670+1G>T; p.(?) premature termination predicted by spliceAI.
				Described as candidate gene in intellectual disability 20 and many Genematcher submissions
Psychomotor and speech delay	DIP2C	Heterozygous (LoF) inherited from affected father	Variant of unknown significance	Non OMIM morbid gene
		NM_014974.3:c.3173_3176del; p.(Arg1058ProfsTer16)
				Described in speech delay 21 and many Genematcher submissions
Speech delay and autism	PSMD6	Heterozygous (LoF) de novo	Not mentioned	Non OMIM morbid gene
		NM_014814.3:c.1053_1059dup; p.(Val354Ter)
				Candidate gene, by analogy with other genes encoding proteins constituting the proteasome (PSMD12, PSMC1, PSMC3), pLi = 1, functional testing available (proteasome function)
Psychomotor delay and autism	MCM6	Heterozygous (missense) de novo for twins	Variant of unknown significance	OMIM morbid gene referenced in “Lactase persistance”.
		NM_005915.6:c.713C>G; p.(Ala238Gly)
				Neurodevelopmental disorder described 22
				functional testing available (ciliary formation in fibroblasts)
Polycythemia	ARID1B	Compound heterozygous (NM_001374828.1)	Not mentioned	OMIM morbid gene referenced in neurodevelopmental disorder Coffin-Siris.
		c.37G>A; p.(Ala13Thr)
				Described in the Andean population, this candidate gene is involved in polycythemia adaptation to resist high-altitude hypoxia23
		c.1191_1193del; p.(Gly402del)
Polycythemia	USF2	Heterozygous (missense) de novo	Not mentioned	Non OMIM morbid gene
		NM_003367.4:c.776C>T; p.(Ser259Leu)
				Described in regulation of gamma globin genes (HBG1, HBG2) expression level 24
Mild intellectual disability	CSMD1	Compound heterozygous (NM_033225.6)	Not mentioned	Non OMIM morbid gene
		c.415+43500_415+165275del; p.(?)
				Described in a neurodevelopmental disorder with intellectual disability and variable cortical malformations 25
		c.5110C>G; p.(Pro1704Ala)
Undetermined nephropathy	ZNFR3	Heterozygous (LoF) de novo	Not mentioned	Non OMIM morbid gene
(Nephrotic syndrome, End-Stage Kidney Disease)		NM_001206998.2:c.1034del ; p.(Ser345ThrfsTer18)
				Described in patients with non-syndromic manifestations carrying loss-of-function variants 26.
Syndromic developmental delay, including macrocephaly, obesity, intellectual disability, autism spectrum disorder, and neurosensorial defects	SFPQ	Heterozygous (LoF) de novo	Not mentioned	Non OMIM morbid gene
		NM_005066.3:c.922_923del; p.(Ile308HisfsTer4)
				Described at deleterious for brain and motor development in a zebrafish model27, and many Genematcher submissions
Speech delay and behavioral issues	HOMER1	Heterozygous (Frameshift Truncation) de novo	Variant of unknown significance	Non OMIM morbid gene
		NM_004272.5:c.897del ; p.(Asp300ThrfsTer9)
		Not predict to undergo NMD (Loss of >10% of protein)		Protein HOMER1 is a postsynaptic density scaffolding protein, and many Genematcher submissions
Syndromic developmental delay, including microcephaly, unilateral kidney agenesis, behavorial issues and speech delay	LHX2	Heterozygous (missense) de novo	Likely pathogenic variant	Non OMIM morbid gene
		NM_004789.4(LHX2):c.809G>A ; p.(Arg270His)
		(loss of DNA interaction after modelisation on alphafoldserver)28		Described in patients with variable neurodevelopmental disorder compatible 29
*HNF1A likely pathogenic variant (HNF1A-MODY) was also found which explains early-onset diabetes CAKUT = congenital anomalies of the kidney and urinary tract; LoF = Loss of Function , NMD = nonsense mediated decay
